# Supplementary material for: Capturing temporal and spatial variability in the chemistry of shallow permafrost ponds
Source: Copernicus journal article supplement (doi:10.5194/bg-14-5471-2017), 2017-12-04
Supplement: Supplementary file 1 [file bg-14-5471-2017-supplement.pdf]

Supplement of Biogeosciences, 14, 5471–5485, 2017  
<https://doi.org/10.5194/bg-14-5471-2017-supplement>  
© Author(s) 2017. This work is distributed under  
the Creative Commons Attribution 3.0 License.

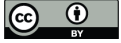

*Supplement of*

## **Capturing temporal and spatial variability in the chemistry of shallow permafrost ponds**

**Matthew Q. Morison et al.**

*Correspondence to:* Matthew Q. Morison ([mmorison@uwaterloo.ca](mailto:mmorison@uwaterloo.ca))

The copyright of individual parts of the supplement might differ from the CC BY 3.0 License.

**Supplementary Table S1. Reported sampling designs for studies focused on, or including small (< 1 km<sup>2</sup>) lakes and ponds. When categorizing analytes of interest for each study, “nutrients” refers to the measurement of any dissolved or particulate nitrogen or phosphorus speciation, “carbon” refers to any measurements of dissolved or particulate organic or inorganic carbon, “major ions” refers to the measurement of dissolved sodium, magnesium, calcium, potassium, chloride, sulphate, and carbonate, and “metals” refers to the measurement of dissolved or suspended trace metal elements.**

| Study                        | Analytes of interest                  | Region                                       | Study year(s) | Number of ponds/lakes studied | Number of samples per year |
|------------------------------|---------------------------------------|----------------------------------------------|---------------|-------------------------------|----------------------------|
| Archer et al., 2016          | Nutrients, Metals                     | Ross Sea, Antarctica                         | 2009-2013     | 41                            | 1                          |
| Balasubramaniam et al., 2015 | Nutrients, Carbon, Major Ions         | Old Crow Flats, Yukon                        | 2007          | 56                            | 3                          |
| Bos and Pellatt., 2012       | Nutrients, Carbon, Metals             | Hudson Bay Lowlands, Manitoba                | 2004          | 32                            | 1                          |
| Breton et al., 2009          | Nutrients, Carbon                     | Northern Quebec and Baffin Island            | 2004-2005     | 46                            | 1                          |
| Hinkel et al., 2016          | Nutrients, Carbon, Major Ions         | North Slope of Alaska                        | 2012-2013     | 28                            | 1                          |
| Houben et al., 2016          | Nutrients, Carbon, Major Ions, Metals | Northwest Territories                        | 2009-2012     | 38                            | 1                          |
| Jacques et al., 2016         | Nutrients, Carbon, Major Ions         | Hudson Bay Lowlands, Manitoba                | 2010-2012     | 33                            | 1                          |
| Kokelj et al., 2009          | Carbon, Major Ions                    | Mackenzie River Delta, Canada                | 2005-2006     | 73                            | 1                          |
| Larsen et al., 2017          | Nutrients, Carbon, Major Ions         | Environmental Gradient within Alaska         | 2006-2013     | 617                           | 1                          |
| Lim et al., 2001             | Nutrients, Carbon                     | Bathurst Island, Arctic Canada               | 1994          | 38                            | 1                          |
| Lyons et al., 2012           | Major Ions                            | Taylor Valley, Antarctica                    | 2000-2010     | 7                             | 1                          |
| MacDonald et al., 2014       | Nutrients, Carbon                     | Hudson Bay Lowlands, Manitoba                | 2010 - 2012   | 16                            | 3                          |
| MacLeod et al., 2016         | Nutrients, Carbon, Major Ions, Metals | Hudson Bay Lowlands, Ontario                 | 2011 - 2012   | 98                            | 1                          |
| Mallory et al., 2006         | Nutrients, Carbon, Major Ions, Metals | Southampton Island, Nunavut                  | 2001-2002     | 32                            | 1                          |
| Manasypov et al., 2014       | Carbon, Major Ions, Metals            | Western Siberia                              | 2010-2011     | 58                            | 1                          |
| Michelutti et al., 2002      | Nutrients, Carbon, Major Ions, Metals | Wynniatt Bay, Victoria Island, Arctic Canada | 1997          | 34                            | 1                          |

|                        |                                             |                                     |           |    |   |
|------------------------|---------------------------------------------|-------------------------------------|-----------|----|---|
| Niu et al., 2011       | Major Ions                                  | Kunlun<br>Mountain pass,<br>Tibet   | 2007      | 10 | 1 |
| Paterson et al., 2014  | Nutrients,<br>Carbon, Major<br>Ions, Metals | Hudson Bay<br>Lowlands,<br>Ontario  | 2009-2011 | 17 | 1 |
| Pienitz et al., 1997   | Nutrients,<br>Carbon, Major<br>Ions, Metals | Yukon and<br>NWT, Canada            | 1990      | 59 | 1 |
| Pokrovsky et al., 2011 | Carbon, Major<br>Ions, Metals               | Northwestern<br>Siberia             | 2008-2010 | 20 | 1 |
| White et al., 2014     | Nutrients, Major<br>Ions                    | Hudson Bay<br>Lowlands,<br>Manitoba | 2010      | 20 | 3 |

## References

- Archer, S. D., McDonald, I. R., Herbold, C. W., Lee, C. K., Niederberger, T. S., and Cary, C.: Temporal, regional and geochemical drivers of microbial community variation in the melt ponds of the Ross Sea region, Antarctica. *Polar Biol.*, 39(2), 267-282, 2016.
- Balasubramaniam, A. M., Hall, R. I., Wolfe, B. B., Sweetman, J. N., and Wang, X.: Source water inputs and catchment characteristics regulate limnological conditions of shallow subarctic lakes (Old Crow Flats, Yukon, Canada). *Can. J. Fish. Aquat. Sci.*, 72(7), 1058-1072, 2015.
- Bos, D. G., and Pellatt, M. G.: The water chemistry of shallow ponds around Wapusk national park of Canada, Hudson Bay Lowlands. *Can. Water. Resour. J.*, 37(3), 163-175, 2012.
- Breton, J., Vallieres, C., and Laurion, I.: Limnological properties of permafrost thaw ponds in northeastern Canada. *Canadian Can. J. Fish. Aquat. Sci.*, 66(10), 1635-1648, 2009.
- Hinkel, K. M., Arp, C. D., Townsend-Small, A., and Frey, K. E.: Can Deep Groundwater Influx be Detected from the Geochemistry of Thermokarst Lakes in Arctic Alaska?. *Permafrost. Periglac.*, doi: 10.1002/ppp.1895, 2016.
- Houben, A. J., French, T. D., Kokelj, S. V., Wang, X., Smol, J. P., and Blais, J. M.: The impacts of permafrost thaw slump events on limnological variables in upland tundra lakes, Mackenzie Delta region. *Fund. Appl. Limnol.*, 189(1), 11-35, 2016.
- Jacques, O., Bouchard, F., MacDonald, L. A., Hall, R. I., Wolfe, B. B., and Pienitz, R.: Distribution and diversity of diatom assemblages in surficial sediments of shallow lakes in Wapusk National Park (Manitoba, Canada) region of the Hudson Bay Lowlands. *Ecol. Evol.*, 6(13), 4526-4540, 2016.
- Kokelj, S. V., Zajdlik, B., and Thompson, M. S.: The impacts of thawing permafrost on the chemistry of lakes across the subarctic boreal-tundra transition, Mackenzie Delta region, Canada. *Permafrost. Periglac.*, 20(2), 185-199, 2009.
- Larsen, A. S., O'Donnell, J. A., Schmidt, J. H., Kristenson, H. J., and Swanson, D. K.: Physical and chemical characteristics of lakes across heterogeneous landscapes in arctic and subarctic Alaska. *J. Geophys. Res.-Biogeo.*, 122, doi:10.1002/2016JG003729, 2017.
- Lim D.S.S., Douglas M.S.V., Smol J.P., Lean D.R.S.: Physical and chemical limnological characteristics of 38 lakes and ponds on Bathurst Island, Nunavut, Canadian High Arctic. *Int. Rev. Hydrobiol.*, 86(1), 1-22, 2001.

- Lyons, W. B., Welch, K. A., Gardner, C. B., Jaros, C., Moorhead, D. L., Knoepfle, J. L., and Doran, P. T.: The geochemistry of upland ponds, Taylor Valley, Antarctica. *Antarct. Sci.*, 24(01), 3-14, 2012.
- MacDonald, L. A., Farquharson, N., Hall, R. I., Wolfe, B. B., Macrae, M. L., and Sweetman, J. N.: Avian-driven modification of seasonal carbon cycling at a tundra pond in the Hudson Bay Lowlands (northern Manitoba, Canada). *Arct. Antarct. Alp. Res.*, 46(1), 206-217, 2014.
- MacLeod, J., Keller, W., Paterson, A.M., Dyer, R.D., and Gunn, J.M.: Scale and watershed features determine lake chemistry patterns across physiographic regions in the far north of Ontario, Canada, *J. Limnol.*, doi: 10.4081/jlimnol.2016.1553, 2016.
- Mallory, M. L., Fontaine, A. J., Smith, P. A., Wiebe Robertson, M. O., and Gilchrist, H. G.: Water chemistry of ponds on Southampton Island, Nunavut, Canada: effects of habitat and ornithogenic inputs. *Arch. Hydrobiol.*, 166(3), 411-432, 2006.
- Manasypov, R. M., Pokrovsky, O. S., Kirpotin, S. N., and Shirokova, L. S.: Thermokarst lake waters across the permafrost zones of western Siberia. *Cryosphere*, 8(4), 1177-1193, 2014.
- Michelutti, N., Douglas, M. S., Lean, D. R., and Smol, J. P.: Physical and chemical limnology of 34 ultra-oligotrophic lakes and ponds near Wynniatt Bay, Victoria Island, Arctic Canada. *Hydrobiologia*, 482(1), 1-13, 2002.
- Niu, F., Lin, Z., Liu, H., and Lu, J.: Characteristics of thermokarst lakes and their influence on permafrost in Qinghai-Tibet Plateau. *Geomorphology*, 132(3), 222-233, 2011.
- Paterson, A. M., Keller, W., Rühland, K. M., Jones, F. C., and Winter, J. G.: An exploratory survey of summer water chemistry and plankton communities in lakes near the Sutton River, Hudson Bay Lowlands, Ontario, Canada. *Arct. Antarct. Alp. Res.*, 46(1), 121-138, 2014.
- Pienitz, R., Smol, J. P., and Lean, D. R.: Physical and chemical limnology of 59 lakes located between the southern Yukon and the Tuktoyaktuk Peninsula, Northwest Territories (Canada). *Can. J. Fish. Aquat. Sci.*, 54(2), 330-346, 1997.
- Pokrovsky, O. S., Shirokova, L. S., Kirpotin, S. N., Audry, S., Viers, J., and Dupré, B.: Effect of permafrost thawing on organic carbon and trace element colloidal speciation in the thermokarst lakes of western Siberia. *Biogeosciences*, 8(3), 565-583, 2011.
- White, J., Hall, R. I., Wolfe, B. B., Light, E. M., Macrae, M. L., and Fishback, L.: Hydrological connectivity and basin morphometry influence seasonal water-chemistry variations in tundra ponds of the northwestern Hudson Bay Lowlands. *Arct. Antarct. Alp. Res.*, 46(1), 218-235, 2014.

**Supplementary Table S2. All concentration data of all chemical species over study period in each study pond, including an intensive sampling campaign in Frisbee and Strange lakes coincident with a storm event, DOY 185 to 188.**

| Location           | Date and Time       | DON   | Cl <sup>-</sup> | SO <sub>4</sub> <sup>2-</sup> | Na <sup>+</sup> | K <sup>+</sup> | Mg <sup>2+</sup> | Ca <sup>2+</sup> | NH <sub>4</sub> <sup>+</sup> | NO <sub>3</sub> <sup>-</sup> |
|--------------------|---------------------|-------|-----------------|-------------------------------|-----------------|----------------|------------------|------------------|------------------------------|------------------------------|
| Erin               | 2015-05-25 12:00 PM | 0.50  | 12.11           | 2.47                          | 7.25            | 0.78           | 4.99             | 7.26             | 0.11                         | 0.01                         |
|                    | 2015-06-04 12:00 PM | 0.39  | 10.41           | 2.16                          | 6.26            | 0.62           | 4.45             | 13.00            | 0.03                         | 0.01                         |
|                    | 2015-06-17 12:00 PM | 0.36  | 10.29           | 2.11                          | 6.44            | 0.57           | 4.70             | 8.79             | 0.05                         | 0.01                         |
|                    | 2015-07-01 4:05 PM  | 0.60  | 12.53           | 2.43                          | 7.95            | 0.78           | 6.11             | 10.27            | 0.08                         | 0.01                         |
|                    | 2015-07-06 4:30 PM  | 0.55  | 10.22           | 1.95                          | 6.64            | 0.57           | 5.10             | 12.06            | 0.11                         | 0.01                         |
|                    | 2015-07-22 10:39 AM | 0.65  | 12.10           | 2.27                          | 7.88            | 0.78           | 6.42             | 12.28            | 0.07                         | 0.01                         |
|                    | 2015-08-05 10:16 AM | 0.68  | 12.26           | 2.38                          | 7.86            | 0.75           | 6.59             | 7.90             | 0.04                         | 0.00                         |
|                    | 2015-08-19 3:03 PM  | 0.72  | 13.39           | 2.38                          | 8.46            | 0.82           | 7.15             | 7.97             | 0.04                         | 0.01                         |
|                    | 2015-09-02 3:23 PM  | 0.90  | 14.18           | 2.41                          | 8.91            | 0.84           | 7.72             | 7.23             | 0.05                         | 0.01                         |
|                    | 2015-09-17 8:39 AM  | 0.76  | 14.62           | 2.60                          | 9.38            | 0.89           | 8.46             | 5.95             | 0.06                         | 0.01                         |
|                    | 2015-10-03 3:37 PM  | 0.90  | 15.03           | 2.99                          | 9.91            | 0.87           | 8.94             | 8.24             | 0.08                         | 0.01                         |
|                    | 2015-10-14 10:00 AM | 0.53  | 12.14           | 2.78                          | 7.51            | 0.70           | 8.00             | 6.30             | 0.16                         | 0.01                         |
| Frisbee            | 2015-05-25 12:00 PM | 0.41  | 35.67           | 7.49                          | 19.44           | 1.15           | 6.61             | 18.81            | 0.07                         | 0.01                         |
|                    | 2015-06-04 12:00 PM | 0.40  | 20.00           | 7.34                          | 12.32           | 0.59           | 5.56             | 18.02            | 0.02                         | 0.01                         |
|                    | 2015-06-17 12:00 PM | 0.72  | 19.39           | 9.17                          | 11.65           | 0.45           | 7.30             | 22.04            | 0.07                         | 0.01                         |
|                    | 2015-07-01 3:52 PM  | 2.25  | 56.62           | 18.89                         | 26.60           | 1.54           | 15.47            | 32.34            | 0.10                         | 0.00                         |
|                    | 2015-07-04 7:45 AM  | 1.66  | 31.09           | 10.92                         | 14.69           | 0.82           | 10.25            | 24.91            | 0.09                         | 0.01                         |
|                    | 2015-07-04 2:30 PM  | 0.88  | 29.54           | 10.32                         | 14.60           | 0.73           | 10.19            | 19.73            | 0.13                         | 0.00                         |
|                    | 2015-07-04 8:30 PM  | 1.02  | 26.75           | 12.03                         | 13.61           | 0.70           | 10.16            | 25.50            | 0.06                         | 0.02                         |
|                    | 2015-07-05 7:45 AM  | 0.61  | 14.07           | 7.17                          | 8.70            | 0.42           | 6.99             | 20.90            | 0.04                         | 0.01                         |
|                    | 2015-07-05 3:00 PM  | 0.60  | 13.88           | 6.78                          | 8.89            | 0.34           | 6.55             | 19.01            | 0.04                         | 0.01                         |
|                    | 2015-07-06 7:30 AM  | 0.64  | 14.57           | 8.75                          | 9.70            | 0.30           | 7.27             | 23.42            | 0.04                         | 0.00                         |
|                    | 2015-07-06 4:30 PM  | 0.89  | 15.97           | 9.83                          | 10.08           | 0.32           | 7.18             | 24.40            | 0.04                         | 0.00                         |
|                    | 2015-07-22 10:25 AM | 1.33  | 40.53           | 17.56                         | 20.66           | 0.95           | 15.32            | 23.01            | 0.05                         | 0.00                         |
|                    | 2015-08-05 10:32 AM | 1.17  | 36.50           | 14.84                         | 18.81           | 0.87           | 15.69            | 17.05            | 0.06                         | 0.01                         |
|                    | 2015-08-19 3:21 PM  | 1.67  | 52.49           | 18.44                         | 26.61           | 1.20           | 19.10            | 25.29            | 0.08                         | 0.01                         |
|                    | 2015-09-02 3:37 PM  | 2.36  | 67.82           | 19.31                         | 31.20           | 1.49           | 24.55            | 21.60            | 0.05                         | 0.00                         |
|                    | 2015-09-17 8:57 AM  | 1.86  | 72.63           | 17.96                         | 32.99           | 1.74           | 27.50            | 28.84            | 0.04                         | 0.01                         |
|                    | 2015-10-03 3:55 PM  | 1.25  | 46.06           | 23.22                         | 25.03           | 0.93           | 24.28            | 15.00            | 0.06                         | 0.01                         |
| 2015-10-14 9:46 AM | 0.46                | 25.27 | 22.57           | 13.80                         | 0.59            | 15.86          | 14.87            | 0.20             | 0.01                         |                              |
| Larch              | 2015-05-25 12:00 PM | 0.15  | 12.13           | 2.18                          | 5.88            | 0.58           | 4.31             | 9.18             | 0.04                         | 0.01                         |
|                    | 2015-06-04 12:00 PM | 0.32  | 15.32           | 5.86                          | 10.33           | 0.78           | 8.50             | 11.59            | 0.03                         | 0.01                         |
|                    | 2015-06-17 12:00 PM | 0.33  | 15.25           | 3.31                          | 11.39           | 0.80           | 9.26             | 8.46             | 0.03                         | 0.01                         |
|                    | 2015-07-01 3:47 PM  | 0.43  | 19.44           | 7.18                          | 13.40           | 0.85           | 10.90            | 12.24            | 0.05                         | 0.01                         |
|                    | 2015-07-06 4:30 PM  | 0.51  | 13.30           | 1.08                          | 8.96            | 0.53           | 7.10             | 12.22            | 0.06                         | 0.01                         |
|                    | 2015-07-22 10:20 AM | 0.47  | 15.45           | 2.86                          | 11.19           | 0.65           | 9.83             | 8.93             | 0.09                         | 0.00                         |
|                    | 2015-08-05 10:26 AM | 0.58  | 16.32           | 2.90                          | 12.03           | 0.73           | 11.19            | 8.99             | 0.06                         | 0.01                         |
|                    | 2015-08-19 3:15 PM  | 0.58  | 17.80           | 3.00                          | 14.80           | 0.94           | 13.58            | 7.98             | 0.04                         | 0.01                         |
|                    | 2015-09-02 3:30 PM  | 0.65  | 19.25           | 3.27                          | 13.42           | 0.91           | 12.68            | 7.56             | 0.04                         | 0.01                         |

|                     |                     |                     |       |       |       |       |       |       |      |      |      |
|---------------------|---------------------|---------------------|-------|-------|-------|-------|-------|-------|------|------|------|
|                     | 2015-09-17 8:46 AM  | 0.59                | 20.25 | 3.12  | 14.47 | 1.02  | 14.15 | 7.81  | 0.14 | 0.01 |      |
|                     | 2015-10-03 3:48 PM  | 0.57                | 19.38 | 2.81  | 13.66 | 0.99  | 13.31 | 6.99  | 0.07 | 0.00 |      |
|                     | 2015-10-14 9:42 AM  | 0.55                | 17.70 | 2.09  | 12.15 | 0.91  | 11.58 | 8.81  | 0.19 | 0.01 |      |
| Left                | 2015-05-25 12:00 PM | 0.35                | 14.73 | 2.68  | 9.31  | 1.09  | 6.37  | 8.51  | 0.06 | 0.01 |      |
|                     | 2015-06-04 12:00 PM | 0.45                | 14.47 | 1.36  | 12.77 | 0.98  | 9.34  | 10.70 | 0.07 | 0.01 |      |
|                     | 2015-06-17 12:00 PM | 0.39                | 23.38 | 6.40  | 14.87 | 1.00  | 11.14 | 10.67 | 0.03 | 0.01 |      |
|                     | 2015-07-01 4:00 PM  | 1.07                | 38.83 | 9.58  | 22.44 | 1.52  | 14.52 | 13.21 | 0.10 | 0.01 |      |
|                     | 2015-07-06 4:30 PM  | 0.75                | 23.17 | 5.10  | 13.99 | 0.82  | 10.33 | 17.34 | 0.00 | 0.00 |      |
|                     | 2015-07-22 10:48 AM | 0.90                | 32.89 | 7.14  | 18.70 | 1.18  | 13.25 | 14.78 | 0.08 | 0.01 |      |
|                     | 2015-08-05 10:48 AM | 0.89                | 36.20 | 6.97  | 20.41 | 1.21  | 14.88 | 12.98 | 0.03 | 0.00 |      |
|                     | 2015-08-19 2:53 PM  | 1.10                | 48.32 | 11.11 | 26.63 | 1.33  | 16.68 | 10.70 | 0.07 | 0.01 |      |
|                     | 2015-09-02 3:57 PM  | 1.12                | 57.11 | 13.73 | 31.64 | 1.28  | 20.64 | 12.02 | 0.05 | 0.01 |      |
|                     | 2015-09-17 9:07 AM  | 1.03                | 73.92 | 19.65 | 40.34 | 1.42  | 28.88 | 13.89 | 0.16 | 0.01 |      |
|                     | 2015-10-03 4:16 PM  | 0.72                | 57.13 | 17.92 | 32.88 | 1.43  | 24.25 | 10.29 | 0.03 | 0.01 |      |
|                     | 2015-10-14 10:14 AM | 0.54                | 45.56 | 14.68 | 25.39 | 1.82  | 18.04 | 9.63  | 0.04 | 0.01 |      |
|                     | Sandwich            | 2015-05-25 12:00 PM | 0.26  | 8.70  | 0.65  | 5.82  | 0.55  | 4.21  | 8.87 | 0.16 | 0.01 |
|                     |                     | 2015-06-04 12:00 PM | 0.35  | 14.36 | 1.31  | 9.45  | 0.69  | 7.25  | 8.16 | 0.05 | 0.01 |
| 2015-06-17 12:00 PM |                     | 0.55                | 15.32 | 3.55  | 9.44  | 0.67  | 7.54  | 10.42 | 0.25 | 0.01 |      |
| 2015-07-01 3:43 PM  |                     | 0.60                | 17.43 | 1.06  | 11.38 | 0.90  | 8.56  | 10.19 | 0.13 | 0.01 |      |
| 2015-07-06 4:30 PM  |                     | 0.53                | 13.04 | 0.95  | 8.73  | 0.50  | 7.15  | 15.01 | 0.04 | 0.01 |      |
| 2015-07-22 10:17 AM |                     | 0.57                | 14.08 | 1.04  | 9.86  | 0.55  | 8.34  | 8.02  | 0.16 | 0.01 |      |
| 2015-08-05 10:24 AM |                     | 0.73                | 15.14 | 1.04  | 10.69 | 0.60  | 9.34  | 8.13  | 0.05 | 0.01 |      |
| 2015-08-19 3:11 PM  |                     | 0.76                | 17.10 | 0.87  | 12.12 | 0.69  | 9.86  | 7.34  | 0.03 | 0.00 |      |
| 2015-09-02 3:27 PM  |                     | 0.77                | 18.82 | 0.88  | 13.28 | 0.74  | 11.27 | 13.65 | 0.04 | 0.01 |      |
| 2015-09-17 8:45 AM  |                     | 0.72                | 20.04 | 0.83  | 14.50 | 0.76  | 12.77 | 9.59  | 0.06 | 0.01 |      |
| 2015-10-03 3:45 PM  |                     | 0.75                | 20.11 | 0.90  | 13.80 | 0.77  | 11.77 | 6.65  | 0.04 | 0.01 |      |
| 2015-10-14 9:39 AM  |                     | 0.48                | 19.14 | 0.81  | 12.49 | 0.70  | 10.98 | 5.97  | 0.05 | 0.01 |      |
| Strange             | 2015-05-25 12:00 PM | 0.41                | 12.47 | 4.11  | 8.56  | 1.29  | 5.68  | 8.33  | 0.03 | 0.01 |      |
|                     | 2015-06-04 12:00 PM | 0.26                | 13.53 | 4.42  | 9.89  | 1.40  | 7.35  | 14.76 | 0.07 | 0.01 |      |
|                     | 2015-06-17 12:00 PM | 0.32                | 13.74 | 4.93  | 10.36 | 1.38  | 7.90  | 13.95 | 0.06 | 0.01 |      |
|                     | 2015-07-01 3:56 PM  | 0.74                | 17.42 | 7.13  | 12.51 | 1.71  | 9.50  | 12.51 | 0.04 | 0.01 |      |
|                     | 2015-07-03 2:30 PM  | 0.83                | 17.77 | 6.76  | 12.58 | 1.74  | 9.68  | 15.16 | 0.03 | 0.01 |      |
|                     | 2015-07-04 7:45 AM  | 0.67                | 15.52 | 5.79  | 11.43 | 1.53  | 9.32  | 15.40 | 0.03 | 0.01 |      |
|                     | 2015-07-04 2:30 PM  | 0.85                | 15.95 | 5.96  | 11.57 | 1.53  | 9.36  | 10.97 | 0.04 | 0.01 |      |
|                     | 2015-07-04 8:30 PM  | 0.71                | 15.48 | 5.93  | 11.43 | 1.51  | 9.37  | 10.51 | 0.05 | 0.01 |      |
|                     | 2015-07-05 7:45 AM  | 0.55                | 13.85 | 5.30  | 10.38 | 1.29  | 8.93  | 19.89 | 0.04 | 0.01 |      |
|                     | 2015-07-05 3:00 PM  | 0.57                | 12.99 | 4.63  | 10.02 | 1.17  | 8.48  | 18.69 | 0.06 | 0.01 |      |
|                     | 2015-07-06 7:30 AM  | 0.49                | 11.83 | 4.32  | 9.71  | 1.08  | 8.42  | 15.23 | 0.06 | 0.01 |      |
|                     | 2015-07-06 4:30 PM  | 0.50                | 12.10 | 5.14  | 9.79  | 1.15  | 8.52  | 17.65 | 0.04 | 0.01 |      |
|                     | 2015-07-22 10:33 AM | 0.49                | 14.87 | 6.42  | 12.31 | 1.37  | 10.85 | 12.06 | 0.03 | 0.01 |      |
|                     | 2015-08-05 10:37 AM | 0.66                | 15.95 | 6.49  | 13.22 | 1.43  | 12.01 | 8.53  | 0.04 | 0.01 |      |
|                     | 2015-08-19 3:26 PM  | 0.72                | 19.57 | 8.16  | 15.84 | 1.45  | 13.17 | 8.42  | 0.10 | 0.01 |      |
| 2015-09-02 3:42 PM  | 0.77                | 25.40               | 10.77 | 18.96 | 1.57  | 15.77 | 8.16  | 0.08  | 0.01 |      |      |

|                    |      |       |       |       |      |       |       |      |      |
|--------------------|------|-------|-------|-------|------|-------|-------|------|------|
| 2015-09-17 8:55 AM | 0.65 | 49.87 | 18.58 | 28.18 | 2.13 | 24.31 | 10.89 | 0.05 | 0.01 |
| 2015-10-03 4:02 PM | 0.51 | 32.37 | 14.39 | 22.93 | 1.82 | 19.33 | 7.53  | 0.03 | 0.01 |
| 2015-10-14 9:52 AM | 0.25 | 24.95 | 12.30 | 18.92 | 1.84 | 16.96 | 6.65  | 0.05 | 0.01 |
